# Supplementary material for: Comprehensive evaluation of the composition of Mingshan Laochuancha green tea and demonstration of hypolipidemic activity in a zebrafish obesity model
Source: Royal Society of Chemistry journal article supplement (doi:10.1039/c9ra07655g), 2019-01-01
Supplement: c9ra07655g1.pdf [file c9ra07655g1.pdf]

**Table S1.** Contents of main phenolic compounds and purine alkaloids in MLGT water extract tested for hypolipidemic activity

| Compounds                       | Contents ( $\mu\text{g/g}$ ) |
|---------------------------------|------------------------------|
| Gallic acid (GA)                | $9.22 \pm 0.04$              |
| Epicatechin (EC)                | $15.14 \pm 0.21$             |
| Epigallocatechin (EGC)          | $26.25 \pm 0.75$             |
| Epicatechin gallate (ECG)       | $53.40 \pm 2.94$             |
| Epigallocatechin gallate (EGCG) | $163.48 \pm 9.37$            |
| Total catechins                 | $258.28 \pm 13.26$           |
| Theobromine                     | $4.28 \pm 0.22$              |
| Caffeine                        | $101.48 \pm 5.55$            |
| Total alkaloids                 | $105.76 \pm 5.77$            |

All data were expressed as mean  $\pm$  SD (n=2) and on a basis of dry weight of MLGT water extract. MLGT, Mingshan Laochuancha green tea.

**Table S2.** Volatile compounds and relative percentage contents in Mingshan Laochuancha green tea.

| No. | RI   | Compound                                                | CAS number | Content (%)        |
|-----|------|---------------------------------------------------------|------------|--------------------|
| 1   | 798  | 4-Methyl-3-penten-2-one                                 | 141-79-7   | 4.31 (3.81-4.93)   |
| 2   | 855  | ( <i>Z</i> )-3-Hexenol                                  | 928-96-1   | 1.63 (1.25-1.85)   |
| 3   | 869  | Hexanol                                                 | 111-27-3   | 1.57 (1.36-1.96)   |
| 4   | 884  | (6 <i>E</i> )-3,5-Dimethyl-1,6-octadiene                | 74630-87-8 | 0.14 (0.12-0.17)   |
| 5   | 902  | Heptanal                                                | 111-71-7   | 2.88 (2.59-3.25)   |
| 6   | 957  | Benzaldehyde                                            | 100-52-7   | 0.69 (0.52-0.83)   |
| 7   | 970  | Heptanol                                                | 111-70-6   | 0.40 (0.23-0.63)   |
| 8   | 980  | 3-Octenol                                               | 3391-86-4  | 0.66 (0.42-0.97)   |
| 9   | 985  | Sulcatone                                               | 110-93-0   | 2.78 (1.9-3.83)    |
| 10  | 999  | 2,6-Dimethyl-2,6-octadiene                              | 2792-39-4  | 0.76 (0.49-1)      |
| 11  | 1014 | 4-Methyl-3-(1-methylethylidene)-1-cyclohexene           | 99805-90-0 | 0.41 (0.4-0.43)    |
| 12  | 1022 | 3,7,7-Trimethyl-1,3,5-cycloheptatriene                  | 3479-89-8  | 0.48 (0.43-0.56)   |
| 13  | 1026 | D-Limonene                                              | 5989-27-5  | 5.49 (4.94-6.39)   |
| 14  | 1034 | Benzyl alcohol                                          | 100-51-6   | 1.20 (1.12-1.29)   |
| 15  | 1038 | Benzene acetaldehyde                                    | 122-78-1   | 0.29 (0.25-0.36)   |
| 16  | 1042 | 1-Ethyl-2-formylpyrrole                                 | 2167-14-8  | 1.70 (1.4-2.1)     |
| 17  | 1050 | 3-Methyl-1,5-pentanediol                                | 4457-71-0  | 0.28 (0.24-0.32)   |
| 18  | 1054 | 4-Methyldecane                                          | 2847-72-5  | 1.99 (1.69-2.39)   |
| 19  | 1066 | Myrcenol                                                | 543-39-5   | 1.21 (1.05-1.37)   |
| 20  | 1068 | Octanol                                                 | 111-87-5   | 4.51 (4.27-4.78)   |
| 21  | 1083 | ( <i>Z</i> )-Linalool oxide                             | 5989-33-3  | 2.16 (1.76-2.61)   |
| 22  | 1091 | 2,3-Dimethyldecane                                      | 17312-44-6 | 0.20 (0.16-0.27)   |
| 23  | 1099 | Linalool                                                | 78-70-6    | 20.03 (19.4-20.75) |
| 24  | 1102 | Hotrienol                                               | 20053-88-7 | 5.63 (5.26-5.86)   |
| 25  | 1103 | Nonanal                                                 | 124-19-6   | 3.20 (2.3-3.91)    |
| 26  | 1107 | Phenylethyl alcohol                                     | 60-12-8    | 0.72 (0.24-1.78)   |
| 27  | 1113 | ( <i>E</i> )-2-Nonenal                                  | 18829-56-6 | 0.50 (0.38-0.61)   |
| 28  | 1128 | 1-(1-Ethylvinyl)-1-(2-methylene-3-butenyl) cyclopropane | 51567-07-8 | 0.35 (0.31-0.39)   |
| 29  | 1140 | ( <i>E</i> )- $\beta$ -Terpineol                        | 7299-40-3  | 0.20 (0.17-0.23)   |
| 30  | 1166 | 2-Methylundecane                                        | 7045-71-8  | 0.07 (0.05-0.1)    |
| 31  | 1168 | ( <i>E</i> )-Linalool oxide                             | 34995-77-2 | 3.98 (3.62-4.56)   |
| 32  | 1191 | $\alpha$ -Terpineol                                     | 98-55-5    | 0.65 (0.3-0.79)    |
| 33  | 1193 | Safranal                                                | 116-26-7   | 1.10 (0.77-1.33)   |
| 34  | 1200 | Dodecane                                                | 112-40-3   | 0.99 (0.82-1.25)   |
| 35  | 1204 | Decanal                                                 | 112-31-2   | 0.38 (0.32-0.52)   |
| 36  | 1214 | $\beta$ -Cyclocitral                                    | 432-25-7   | 0.76 (0.63-0.92)   |
| 37  | 1223 | Geraniol                                                | 106-24-1   | 9.34 (8.4-9.86)    |
| 38  | 1230 | (3 <i>Z</i> )-3-Hexenyl 2-methylbutanoate               | 53398-85-9 | 0.40 (0.24-0.5)    |
| 39  | 1263 | 4-Methyldodecane                                        | 6117-97-1  | 0.07 (0.04-0.1)    |

|    |      |                                                         |             |                  |
|----|------|---------------------------------------------------------|-------------|------------------|
| 40 | 1276 | 4,6-Dimethyldodecane                                    | 61141-72-8  | 0.80 (0.49-1.22) |
| 41 | 1299 | 2-Methyl-1-decanol                                      | 18675-24-6  | 0.34 (0.28-0.43) |
| 42 | 1306 | Pentyl levulinate                                       | 20279-49-6  | 0.30 (0.22-0.37) |
| 43 | 1321 | 2,6,11-Trimethyldodecane                                | 31295-56-4  | 0.81 (0.74-0.93) |
| 44 | 1343 | $\alpha$ -Cubebene                                      | 17699-14-8  | 0.94 (0.82-1.06) |
| 45 | 1347 | 1,1-Dimethyl-3-vinyllindane                             | 53909-98-1  | 0.17 (0.13-0.18) |
| 46 | 1379 | 5-Hexenyl hexanoate                                     | 108058-81-7 | 0.49 (0.38-0.57) |
| 47 | 1386 | Patchoulane                                             | 25491-20-7  | 2.85 (2.56-3.2)  |
| 48 | 1392 | $\alpha$ -Tetradecene                                   | 1120-36-1   | 0.14 (0.1-0.17)  |
| 49 | 1400 | Tetradecane                                             | 629-59-4    | 0.73 (0.63-0.92) |
| 50 | 1413 | 4,8,8-Trimethyl-2-methylene-4-vinylbicyclo[5.2.0]nonane | 242794-76-9 | 0.42 (0.34-0.5)  |
| 51 | 1425 | $\gamma$ -Elemene                                       | 29873-99-2  | 0.19 (0.15-0.22) |
| 52 | 1444 | Geranyl acetone                                         | 3796-70-1   | 0.98 (0.81-1.06) |
| 53 | 1447 | Nonylcyclopentane                                       | 2882-98-6   | 0.08 (0.06-0.09) |
| 54 | 1451 | ( <i>E</i> )- $\beta$ -Famesene                         | 18794-84-8  | 0.17 (0.08-0.21) |
| 55 | 1461 | 4-Methyltetradecane                                     | 25117-24-2  | 0.22 (0.18-0.26) |
| 56 | 1467 | $\delta$ -Cadinene                                      | 483-76-1    | 0.66 (0.51-0.71) |
| 57 | 1470 | (+)-Valencene                                           | 4630-07-3   | 0.22 (0.21-0.23) |
| 58 | 1473 | $\beta$ -Ionone                                         | 79-77-6     | 0.52 (0.45-0.62) |
| 59 | 1493 | $\alpha$ -Muurolene                                     | 31983-22-9  | 0.34 (0.27-0.37) |
| 60 | 1507 | Germacrene D                                            | 23986-74-5  | 2.04 (1.56-2.31) |
| 61 | 1515 | Calamenene                                              | 483-77-2    | 0.17 (0.15-0.19) |
| 62 | 1527 | $\beta$ -Himachalene                                    | 1461-03-6   | 0.36 (0.24-0.43) |
| 63 | 1571 | 3-Methylpentadecane                                     | 2882-96-4   | 0.28 (0.24-0.36) |
| 64 | 1584 | 2,2,4-Trimethyl-1,3-pentanediol diisobutyrate           | 6846-50-0   | 0.12 (0.09-0.17) |
| 65 | 1600 | Hexadecane                                              | 544-76-3    | 0.26 (0.25-0.26) |
| 66 | 1625 | $\alpha$ -Bisabolol                                     | 515-69-5    | 0.30 (0.22-0.39) |
| 67 | 1816 | Hexadecanal                                             | 629-80-1    | 0.06 (0.04-0.08) |
| 68 | 1824 | Isopropyl myristate                                     | 110-27-0    | 0.23 (0.18-0.29) |
| 69 | 1830 | Caffeine                                                | 58-08-2     | 0.24 (0.13-0.39) |
| 70 | 1838 | 1-Octadecyne                                            | 629-89-0    | 0.30 (0.25-0.36) |
| 71 | 1842 | 2-Heptadecanone                                         | 2922-51-2   | 0.07 (0.05-0.08) |
| 72 | 1880 | 2-Hexadecyloxirane                                      | 7390-81-0   | 0.21 (0.17-0.26) |
| 73 | 1924 | Methyl isoheptadecanoate                                | 6929-04-0   | 0.12 (0.1-0.13)  |
| 74 | 2107 | Phytol                                                  | 150-86-7    | 2.08 (1.38-2.92) |

Compounds were listed in order of their retention time and results were expressed as the average relative content and corresponding content range (n=3). RI, retention indices determined on DB-5MS column using the homologous series of n-alkanes (C<sub>7</sub>-C<sub>24</sub>).

**Table S3.** Different taste data of Mingshan Laochuancha green tea detected by electronic tongue.

| Sample             | Sourness | Bitterness | Astringency | Aftertaste of B | Aftertaste of A | Umami | Richness | Saltiness |
|--------------------|----------|------------|-------------|-----------------|-----------------|-------|----------|-----------|
| Reference solution | -13      | 0          | 0           | 0               | 0               | 0     | 0        | -6        |
| Test-1             | -45.87   | -2.35      | -13.42      | 0.51            | 4.8             | 24.43 | 14.17    | 26.43     |
| Test-2             | -44.23   | -1.22      | -11.88      | 0.55            | 4.73            | 23.72 | 14.34    | 23.04     |
| Test-3             | -44.84   | -1.44      | -12.31      | 0.48            | 4.66            | 24.08 | 14.4     | 23.79     |

Reference solution compositions: 30 mmol/L KCl and 0.3 mmol/L tartaric acid. Test-1, test-2 and test-3 were three parallel tests of green tea water solution. Taste values greater than that of corresponding reference solution expressed the existence of this taste in green tea solution. Aftertaste of B, aftertaste of bitterness; Aftertaste of A, aftertaste of astringency.

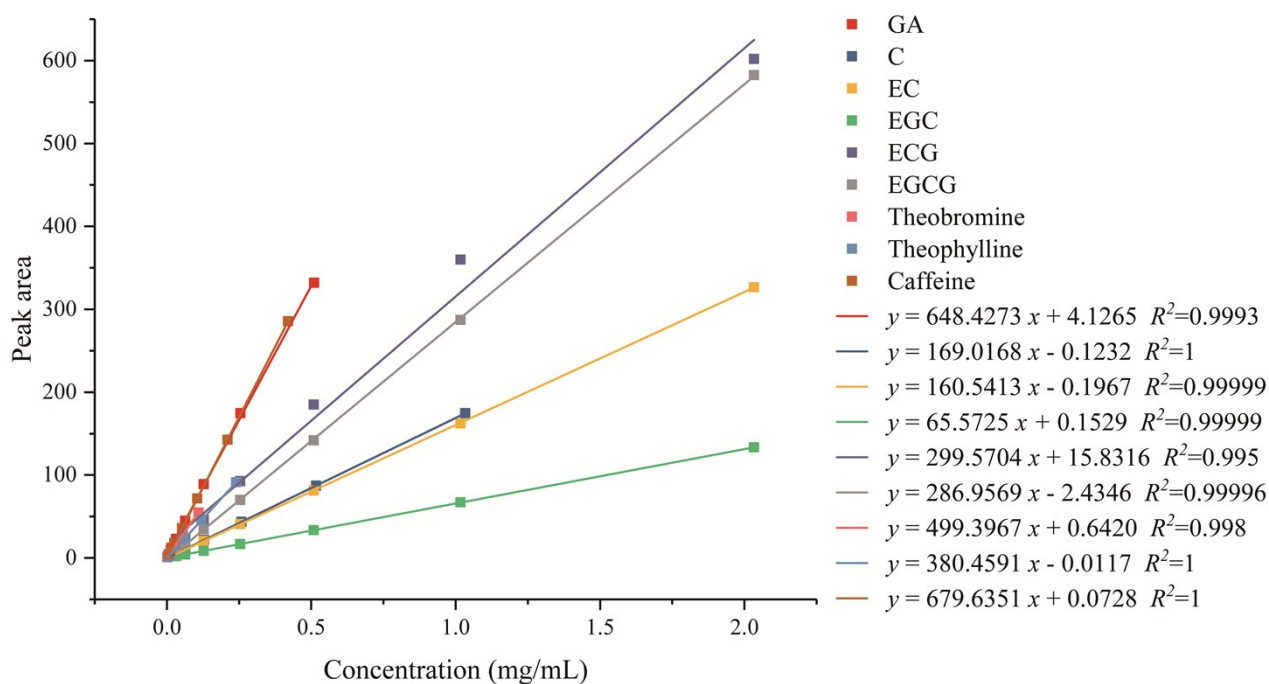

**Figure S1.** Calibration curves of gallic acid (GA); catechin (C); epicatechin (EC); epigallocatechin (EGC); epicatechin gallate (ECG); epigallocatechin gallate (EGCG); theobromine; theophylline; and caffeine recorded at 280 nm.

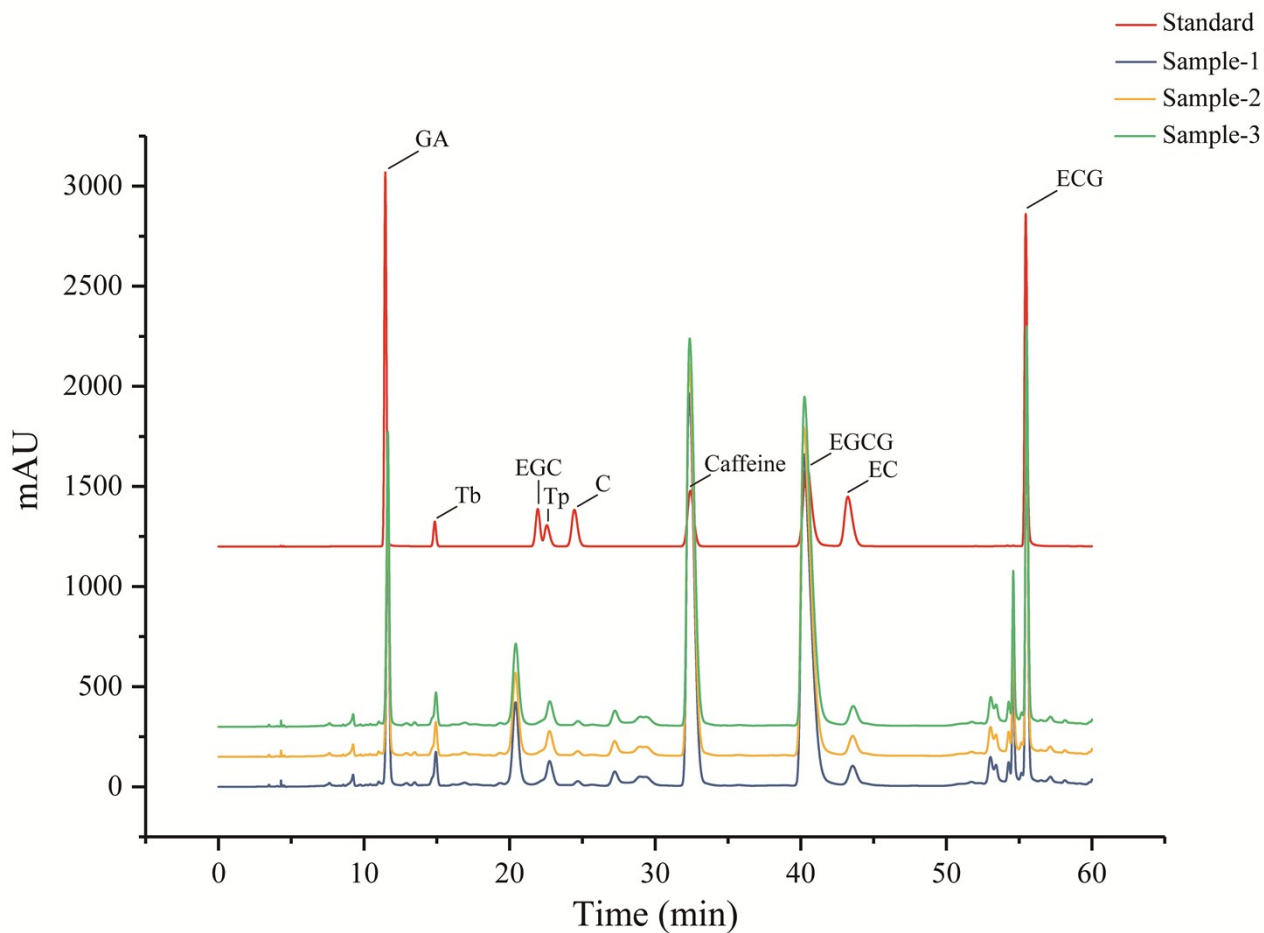

**Figure S2.** High-performance liquid chromatography (HPLC) chromatogram of gallic acid, catechins, and purine alkaloids at 280 nm. GA, gallic acid; Tb, theobromine; EGC, epigallocatechin; Tp, theophylline; C, catechin; EGCG, epigallocatechin gallate; EC, epicatechin; ECG, epicatechin gallate.
